# Supplementary material for: Pore architecture affects photocatalytic activity of periodic mesoporous nanocrystalline anatase thin films
Source: Royal Society of Chemistry journal article supplement (doi:10.1039/b612550f), 2006-10-17
Supplement: b612550f.pdf [file b612550f.pdf]

## Pore-Architecture Affects Photocatalytic Activity of Periodic Mesoporous Nanocrystalline Anatase Thin Films

Moises A. Carreon, Sung Yeun Choi, Marc Mamak, Naveen Chopra, Geoffrey A. Ozin\*

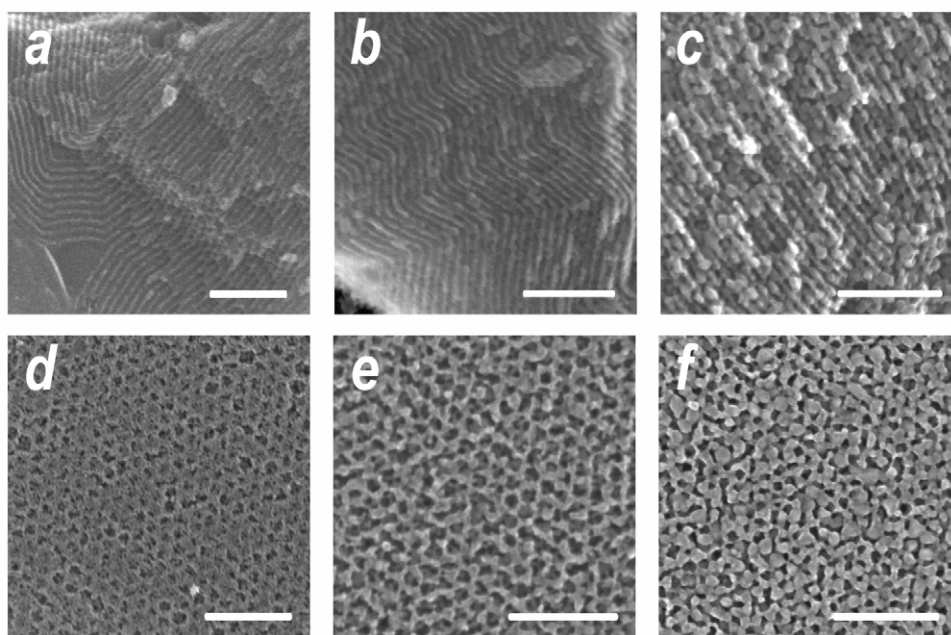

Fig. S1. HRSEM images of h-meso-nc-TiO<sub>2</sub> (a, b, and c) and c-meso-nc-TiO<sub>2</sub> (d, e, and f) used in this study. Calcination temperatures for each samples are 350°C (a, d), 400°C (b, e) and 450°C (c, f). With increasing calcination temperature, titania frameworks coarsened due to anatase crystallite growth. Scale bars seen in this figure represent 100 nm.

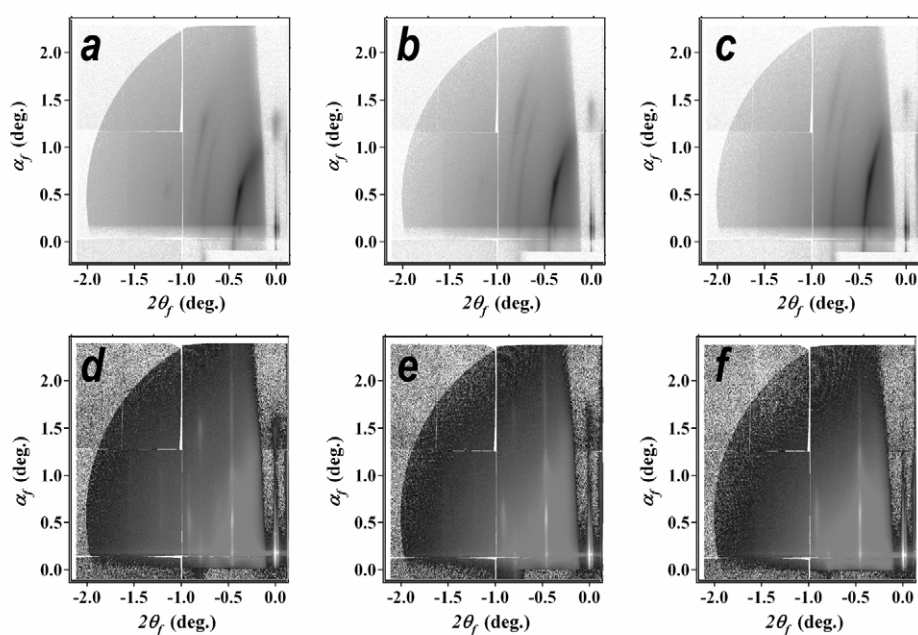

Fig. S2. GISAXS patterns of h-meso-nc-TiO<sub>2</sub> (a, b, and c) and c-meso-nc-TiO<sub>2</sub> (d, e, and f) used in this study. Calcination temperatures for each sample are 350°C (a, d), 400°C (b, e) and 450°C (c, f). Well-defined mesostructure is preserved even in 450°C treated meso-nc-TiO<sub>2</sub>.

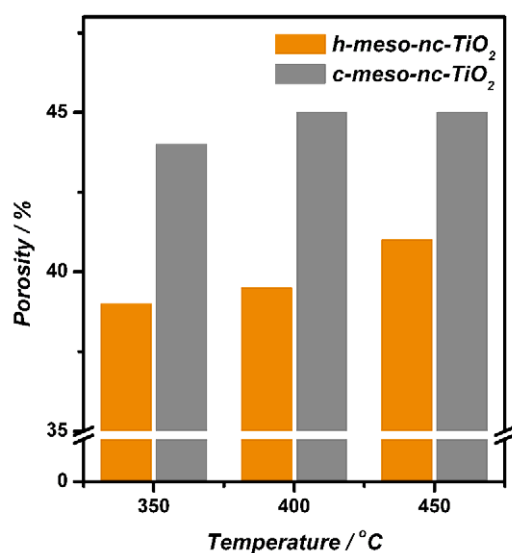

Fig. S3. Porosity of h-meso-nc-TiO<sub>2</sub> (left, orange) and c-meso-nc-TiO<sub>2</sub> (right, grey) thin film samples measured by variable angle ellipsometry spectroscopy (VASE). Note the c-meso-nc-TiO<sub>2</sub> exhibits 10% larger porosity than h-meso-nc-TiO<sub>2</sub>.
